# Supplementary material
Source: publisher figshare collection journal article supplement (https://sage.figshare.com/ndownloader/files/23117108)
Supplement: Supplementary file 1 [file 23117108]

## Supplementary Results

**Primary analyses**

**Model 1: No Moderators.** Model 1 was estimated on data from 1105 participants from seventeen labs (see Table 1 for details). Of the six equal allocation multilevel multivariate compound symmetry (EAMMCS) model specifications, the *Equal Variance, Zero Correlation* specification was chosen by AIC. AIC; fixed effect estimates, standard errors, and  $z$ -statistics; and variance component estimates are shown in Supplementary Table S1.

**Model 2: Finger counting.** Model 2 was estimated on data from 343 consistent left-starters from seventeen labs and 482 consistent right-starters from seventeen labs (see Supplementary Table S2 for details). Of the six EAMMCS model specifications, the *Equal Variance, Zero Correlation* specification was chosen by AIC. AIC; fixed effect estimates, standard errors, and  $z$ -statistics; and variance component estimates are shown in Supplementary Table S3.

**Model 3: Reading/writing direction.** Model 3 was estimated on data from 1014 exclusively left-to-right readers/writers from seventeen labs and 76 not exclusively left-to-right readers/writers from eight labs (see Supplementary Table S4 for details). Of the six EAMMCS model specifications, the *Equal Variance, Zero Correlation* specification was chosen by AIC. AIC; fixed effect estimates, standard errors, and  $z$ -statistics; and variance component estimates are shown in Supplementary Table S5.

**Model 4: Handedness.** Model 4 was estimated on data from 69 left-handed participants from nine labs and 1007 right-handed participants from seventeen labs (see Supplementary Table S6 for details). Of the six EAMMCS model specifications, the *Unequal Variance, Zero Correlation* specification was chosen by AIC. AIC; fixed effect estimates, standard errors, and  $z$ -statistics; and variance component estimates are shown in Supplementary Table S7.

**Model 5: Mathematics fluency and mathematics anxiety.** Model 5 was estimated on data from 1105 participants from seventeen labs (see Table 1). See the main text for model specification

details, but note that (i) for consistency with Model 1 we employed the *Equal Variance, Zero Correlation* specification for effects for each ISI condition for each lab and (ii) the math test and AMAS were centred and scaled by their respective means and standard deviations across the 1105 participants prior to estimation of the model. Fixed effect estimates, standard errors, and *t*-statistics and variance component estimates are shown in Supplementary Table S8.

## Secondary analyses

**Purpose of experiment.** Data from several participants were not included in the primary analysis because they correctly guessed the purpose of the experiment (as assessed by the exit questionnaire). The data from these participants was analyzed separately to determine whether insight into the purpose of the experiment moderated the effect. Specifically, Model 1 was estimated on data from the 41 participants from four labs who correctly guessed the purpose of the experiment (see Supplementary Table S9 for details). Of the six model EAMMCS model specifications, the *Equal Variance, Zero Correlation* specification was chosen by AIC. AIC; fixed effect estimates, standard errors, and *z*-statistics; and variance component estimates are shown in Supplementary Table S10.

**Eye-movement contaminated trials.** Data from individual trials that were contaminated with eye movements were also not included the primary analysis. The data from these trials was analyzed separately to determine whether eye movements moderated the effect. Specifically, Model 1 was estimated on data from 10468 eye movement contaminated trials of 132 participants from five labs with contaminated trials in every combination of ISI and congruency congruency condition (see Supplementary Table S11 for details). Of the six EAMMCS model specifications, the *Fixed Effects* specification was chosen by AIC. AIC; fixed effect estimates, standard errors, and *z*-statistics; and variance component estimates are shown in Supplementary Table S12

Table S1

*Model 1 Estimates.*(a) *AIC*

| Specification                        | AIC    |
|--------------------------------------|--------|
| Fixed Effects                        | 264.12 |
| Equal Variance, Zero Correlation     | 259.66 |
| Equal Variance, Single Correlation   | 261.64 |
| Unequal Variance, Zero Correlation   | 261.04 |
| Unequal Variance, Single Correlation | 260.87 |
| No Constraints                       | 270.83 |

(b) *Fixed Effect Estimates*

| ISI Condition | Estimate | Std. Err. | <i>z</i> |
|---------------|----------|-----------|----------|
| 250 ms        | -0.05    | 0.47      | -0.11    |
| 500 ms        | 1.06     | 0.44      | 2.43     |
| 750 ms        | 0.19     | 0.43      | 0.43     |
| 1000 ms       | 0.18     | 0.42      | 0.44     |

(c) *Variance Component Estimates. Estimates are presented on the standard deviation scale.*

| ISI Condition | Estimate |
|---------------|----------|
| 250 ms        | 1.02     |
| 500 ms        | 1.02     |
| 750 ms        | 1.02     |
| 1000 ms       | 1.02     |

Table S2

*Number of participants in each finger counting group for each of the seventeen labs.*

| Lab                             | Consistent   | Inconsistent | No    | Inconsistent  | Consistent    |
|---------------------------------|--------------|--------------|-------|---------------|---------------|
|                                 | Left-starter | Left-starter | Group | Right-starter | Right-starter |
| Ansari                          | 23           | 2            | 2     | 3             | 30            |
| Bryce                           | 13           | 8            | 2     | 17            | 21            |
| Chen                            | 22           | 0            | 2     | 0             | 36            |
| Cipora                          | 19           | 9            | 5     | 18            | 31            |
| Colling (Szűcs)                 | 21           | 3            | 11    | 3             | 27            |
| Corballis                       | 18           | 3            | 5     | 4             | 34            |
| Hancock                         | 22           | 6            | 0     | 3             | 23            |
| Holmes                          | 14           | 2            | 1     | 8             | 35            |
| Lindemann                       | 22           | 1            | 4     | 1             | 19            |
| Lukavský                        | 12           | 7            | 2     | 16            | 24            |
| Mammarella                      | 30           | 8            | 6     | 23            | 36            |
| Mieth                           | 32           | 10           | 10    | 16            | 25            |
| Moeller                         | 23           | 0            | 6     | 0             | 34            |
| Ocampo                          | 27           | 0            | 2     | 0             | 30            |
| Ortiz-Ouellet-Lupiáñez-Santiago | 10           | 8            | 4     | 22            | 10            |
| Toomarian                       | 19           | 0            | 0     | 0             | 42            |
| Treccani                        | 16           | 7            | 4     | 6             | 25            |

Table S3

*Model 2 Estimates.*(a) *AIC*

| Specification                        | AIC    |
|--------------------------------------|--------|
| Fixed Effects                        | 665.97 |
| Equal Variance, Zero Correlation     | 637.31 |
| Equal Variance, Single Correlation   | 639.00 |
| Unequal Variance, Zero Correlation   | 638.57 |
| Unequal Variance, Single Correlation | 640.13 |
| No Constraints                       | 646.51 |

(b) *Fixed Effect Estimates*

| ISI Condition | Finger counting group    | Estimate | Std. Err. | <i>z</i> |
|---------------|--------------------------|----------|-----------|----------|
| 250 ms        | Consistent Right-starter | 0.29     | 0.72      | 0.40     |
| 250 ms        | Consistent Left-starter  | 0.12     | 0.83      | 0.14     |
| 500 ms        | Consistent Right-starter | 1.24     | 0.66      | 1.88     |
| 500 ms        | Consistent Left-starter  | 0.18     | 0.74      | 0.24     |
| 750 ms        | Consistent Right-starter | 0.13     | 0.67      | 0.19     |
| 750 ms        | Consistent Left-starter  | -0.03    | 0.73      | -0.04    |
| 1000 ms       | Consistent Right-starter | 0.50     | 0.63      | 0.79     |
| 1000 ms       | Consistent Left-starter  | 0.42     | 0.69      | 0.61     |

(c) *Variance Component Estimates. Estimates are presented on the standard deviation scale. 39% of the variance is estimated to be at the lab-level and 61% at the group-level.*

| ISI Condition | Estimate |
|---------------|----------|
| 250 ms        | 1.74     |
| 500 ms        | 1.74     |
| 750 ms        | 1.74     |
| 1000 ms       | 1.74     |

Table S4

*Number of participants in each of the reading/writing direction groups for each of the seventeen labs.*

| Lab                             | Exclusively   | Not exclusively |
|---------------------------------|---------------|-----------------|
|                                 | Left-to-Right | Left-to-Right   |
| Ansari                          | 55            | 5               |
| Bryce                           | 59            | 2               |
| Chen                            | 39            | 21              |
| Cipora                          | 76            | 6               |
| Colling (Szűcs)                 | 55            | 10              |
| Corballis                       | 60            | 4               |
| Hancock                         | 53            | 1               |
| Holmes                          | 54            | 6               |
| Lindemann                       | 47            | 0               |
| Lukavský                        | 58            | 3               |
| Mammarella                      | 103           | 0               |
| Mieth                           | 79            | 14              |
| Moeller                         | 54            | 9               |
| Ocampo                          | 55            | 4               |
| Ortiz-Ouellet-Lupiáñez-Santiago | 54            | 0               |
| Toomarian                       | 56            | 5               |
| Treccani                        | 57            | 1               |

Table S5

*Model 3 Estimates.*(a) *AIC*

| Specification                        | AIC    |
|--------------------------------------|--------|
| Fixed Effects                        | 495.58 |
| Equal Variance, Zero Correlation     | 448.05 |
| Equal Variance, Single Correlation   | 449.41 |
| Unequal Variance, Zero Correlation   | 451.89 |
| Unequal Variance, Single Correlation | 453.44 |
| No Constraints                       | 457.83 |

(b) *Fixed Effect Estimates*

| ISI Condition | Reading/Writing Direction | Estimate | Std. Err. | <i>z</i> |
|---------------|---------------------------|----------|-----------|----------|
| 250 ms        | Exclusively LTR           | 0.10     | 0.59      | 0.17     |
| 250 ms        | Not exclusively LTR       | -1.65    | 1.17      | -1.41    |
| 500 ms        | Exclusively LTR           | 0.91     | 0.56      | 1.62     |
| 500 ms        | Not exclusively LTR       | 2.21     | 1.51      | 1.46     |
| 750 ms        | Exclusively LTR           | 0.24     | 0.56      | 0.43     |
| 750 ms        | Not exclusively LTR       | -2.25    | 1.25      | -1.80    |
| 1000 ms       | Exclusively LTR           | 0.29     | 0.55      | 0.53     |
| 1000 ms       | Not exclusively LTR       | -1.27    | 1.23      | -1.03    |

(c) *Variance Component Estimates. Estimates are presented on the standard deviation scale. 10% of the variance is estimated to be at the lab-level and 90% at the group-level.*

| ISI Condition | Estimate |
|---------------|----------|
| 250 ms        | 1.71     |
| 500 ms        | 1.71     |
| 750 ms        | 1.71     |
| 1000 ms       | 1.71     |

Table S6

*Number of participants in each handedness group for each of the seventeen labs.*

| Lab                             | Left-<br>handed | Right-<br>handed |
|---------------------------------|-----------------|------------------|
| Ansari                          | 4               | 56               |
| Bryce                           | 4               | 57               |
| Chen                            | 5               | 55               |
| Cipora                          | 3               | 79               |
| Colling (Szűcs)                 | 7               | 58               |
| Corballis                       | 9               | 55               |
| Hancock                         | 6               | 48               |
| Holmes                          | 4               | 56               |
| Lindemann                       | 5               | 42               |
| Lukavský                        | 7               | 54               |
| Mammarella                      | 6               | 97               |
| Mieth                           | 14              | 79               |
| Moeller                         | 4               | 59               |
| Ocampo                          | 4               | 55               |
| Ortiz-Ouellet-Lupiáñez-Santiago | 3               | 51               |
| Toomarian                       | 10              | 51               |
| Treccani                        | 3               | 55               |



Table S7

*Model 4 Estimates.*(a) *AIC*

| Specification                        | AIC    |
|--------------------------------------|--------|
| Fixed Effects                        | 598.41 |
| Equal Variance, Zero Correlation     | 473.56 |
| Equal Variance, Single Correlation   | 475.56 |
| Unequal Variance, Zero Correlation   | 470.86 |
| Unequal Variance, Single Correlation | 472.48 |
| No Constraints                       | 480.12 |

(b) *Fixed Effect Estimates*

| ISI Condition | Handedness Group | Estimate | Std. Err. | <i>z</i> |
|---------------|------------------|----------|-----------|----------|
| 250 ms        | Right-handed     | -0.03    | 0.42      | -0.07    |
| 250 ms        | Left-handed      | -1.83    | 1.25      | -1.46    |
| 500 ms        | Right-handed     | 0.95     | 0.54      | 1.76     |
| 500 ms        | Left-handed      | 1.69     | 1.19      | 1.42     |
| 750 ms        | Right-handed     | 0.24     | 0.65      | 0.37     |
| 750 ms        | Left-handed      | -1.92    | 1.28      | -1.50    |
| 1000 ms       | Right-handed     | 0.12     | 0.75      | 0.16     |
| 1000 ms       | Left-handed      | -2.51    | 1.27      | -1.98    |

(c) *Variance Component Estimates. Estimates are presented on the standard deviation scale. 12% of the variance is estimated to be at the lab-level and 88% at the group-level.*

| ISI Condition | Estimate |
|---------------|----------|
| 250 ms        | 0.01     |
| 500 ms        | 1.57     |
| 750 ms        | 2.19     |
| 1000 ms       | 2.71     |

Table S8

*Model 5 Estimates.**(a) Fixed Effect Estimates*

| Effect                                        | Estimate | Std. Err. | <i>t</i> |
|-----------------------------------------------|----------|-----------|----------|
| 250 ms ISI                                    | -0.03    | 0.44      | -0.07    |
| 500 ms ISI                                    | 0.88     | 0.44      | 2.02     |
| 750 ms ISI                                    | 0.01     | 0.44      | 0.02     |
| 1000 ms ISI                                   | 0.21     | 0.44      | 0.48     |
| 250 ms ISI $\times$ Maths test                | -0.15    | 0.42      | -0.35    |
| 500 ms ISI $\times$ Maths test                | -0.80    | 0.42      | -1.90    |
| 750 ms ISI $\times$ Maths test                | -0.24    | 0.42      | -0.57    |
| 1000 ms ISI $\times$ Maths test               | 0.08     | 0.42      | 0.18     |
| 250 ms ISI $\times$ AMAS                      | -0.66    | 0.40      | -1.66    |
| 500 ms ISI $\times$ AMAS                      | 0.29     | 0.40      | 0.73     |
| 750 ms ISI $\times$ AMAS                      | -0.21    | 0.40      | -0.54    |
| 1000 ms ISI $\times$ AMAS                     | -0.57    | 0.40      | -1.44    |
| 250 ms ISI $\times$ Maths test $\times$ AMAS  | -0.12    | 0.39      | -0.30    |
| 500 ms ISI $\times$ Maths test $\times$ AMAS  | -0.38    | 0.39      | -0.98    |
| 750 ms ISI $\times$ Maths test $\times$ AMAS  | -0.24    | 0.39      | -0.63    |
| 1000 ms ISI $\times$ Maths test $\times$ AMAS | 0.22     | 0.39      | 0.56     |

*(b) Variance Component Estimates. Estimates are presented on the standard deviation scale.*

| ISI Condition | Estimate | Additional Effects       | Estimate |
|---------------|----------|--------------------------|----------|
| 250 ms        | 0.85     | Participant              | 0.00     |
| 500 ms        | 0.85     | Maths Test               | 0.61     |
| 750 ms        | 0.85     | AMAS                     | 0.33     |
| 1000 ms       | 0.85     | Maths test $\times$ AMAS | 0.50     |

Table S9

*Number of participants who correctly guessed the purpose of the experiment for each lab.*

| Lab        | <i>n</i> |
|------------|----------|
| Cipora     | 7        |
| Holmes     | 6        |
| Mammarella | 7        |
| Mieth      | 21       |

Table S10

*Model 1 Estimates (only participants who correctly guessed the purpose of the experiment).*

(a) *AIC*

| Specification                        | AIC   |
|--------------------------------------|-------|
| Fixed Effects                        | 80.21 |
| Equal Variance, Zero Correlation     | 71.39 |
| Equal Variance, Single Correlation   | 73.39 |
| Unequal Variance, Zero Correlation   | 73.83 |
| Unequal Variance, Single Correlation | 75.83 |
| No Constraints                       | 85.42 |

(b) *Fixed Effect Estimates*

| ISI Condition | Estimate | Std. Err. | <i>z</i> |
|---------------|----------|-----------|----------|
| 250 ms        | 1.49     | 2.21      | 0.67     |
| 500 ms        | 0.36     | 2.32      | 0.16     |
| 750 ms        | -0.68    | 2.17      | -0.31    |
| 1000 ms       | 1.15     | 2.37      | 0.48     |

(c) *Variance Component Estimates. Estimates are presented on the standard deviation scale.*

| ISI Condition | Estimate |
|---------------|----------|
| 250 ms        | 3.08     |
| 500 ms        | 3.08     |
| 750 ms        | 3.08     |
| 1000 ms       | 3.08     |

Table S11

*Number of participants tested with an eye-tracker, number of participants analyzed in our secondary analysis of eye movement contaminated trials, and number of eye movement contaminated trials in the analysis (total number of eye movement contaminated trials) at each combination of ISI and congruency condition for each lab.*

| Lab                             | Participants | Analysed | Trial Type  | 250 ms    | 500 ms    | 750 ms    | 1000 ms   |
|---------------------------------|--------------|----------|-------------|-----------|-----------|-----------|-----------|
| Colling (Szűcs)                 | 52           | 18       | Congruent   | 64 (88)   | 93 (133)  | 109 (173) | 107 (162) |
|                                 |              |          | Incongruent | 71 (97)   | 95 (144)  | 103 (140) | 95 (142)  |
| Lukavský                        | 61           | 29       | Congruent   | 158 (182) | 201 (240) | 235 (278) | 252 (292) |
|                                 |              |          | Incongruent | 146 (176) | 202 (238) | 231 (280) | 233 (282) |
| Moeller                         | 64           | 53       | Congruent   | 593 (600) | 723 (734) | 774 (787) | 851 (868) |
|                                 |              |          | Incongruent | 621 (635) | 711 (729) | 774 (802) | 842 (858) |
| Ortiz-Ouellet-Lupiañez-Santiago | 28           | 18       | Congruent   | 127 (135) | 165 (177) | 176 (186) | 184 (197) |
|                                 |              |          | Incongruent | 130 (138) | 147 (157) | 167 (174) | 160 (175) |
| Treccani                        | 30           | 14       | Congruent   | 89 (99)   | 113 (136) | 129 (139) | 133 (152) |
|                                 |              |          | Incongruent | 99 (109)  | 116 (126) | 124 (144) | 125 (141) |

Table S12

*Model 1 Estimates (only eye movement contaminated trials).*(a) *AIC*

| Specification                        | AIC    |
|--------------------------------------|--------|
| Fixed Effects                        | 120.28 |
| Equal Variance, Zero Correlation     | 122.28 |
| Equal Variance, Single Correlation   | 124.28 |
| Unequal Variance, Zero Correlation   | 127.98 |
| Unequal Variance, Single Correlation | 129.75 |
| No Constraints                       | 139.65 |

(b) *Fixed Effect Estimates*

| ISI Condition | Estimate | Std. Err. | <i>z</i> |
|---------------|----------|-----------|----------|
| 250 ms        | -5.35    | 6.27      | -0.85    |
| 500 ms        | -2.65    | 4.95      | -0.54    |
| 750 ms        | -5.52    | 3.98      | -1.39    |
| 1000 ms       | 3.86     | 4.17      | 0.93     |

(c) *Variance Component Estimates. Estimates are presented on the standard deviation scale.*

| ISI Condition | Estimate |
|---------------|----------|
| 250 ms        | 0        |
| 500 ms        | 0        |
| 750 ms        | 0        |
| 1000 ms       | 0        |
